# Supplementary material for: The addition of an amylopectin/chromium complex to branched-chain amino acids enhances muscle protein synthesis in rat skeletal muscle
Source: Springer Nature journal article supplement (doi:10.1186/s12970-020-00355-8), 2020-01-03

**Supplementary Figure 1.** Western Blot bands for mammalian target of rapamycin (mTOR), ribosomal protein S6 kinase beta-1 (S6K1), eukaryotic translation initiation factor 4E-binding protein 1 (4E-BP1), and  $\beta$ -actin levels.

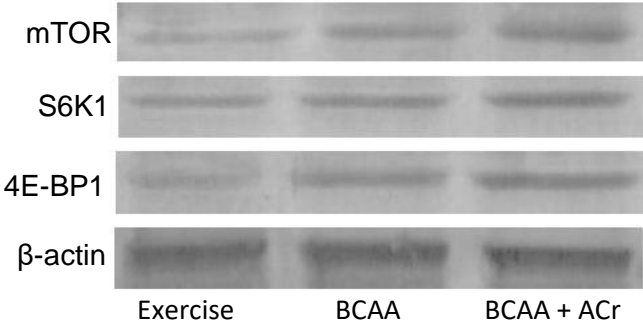

Supplement: MOESM1 [file 18020848]
